# Supplementary material for: Correcting the impact of docking pose generation error on binding affinity prediction
Source: Springer Nature journal article supplement (doi:10.1186/s12859-016-1169-4), 2016-09-01

**N=382, RMSE=1.87, SD=1.78, Rp=0.437, Rs=0.432**

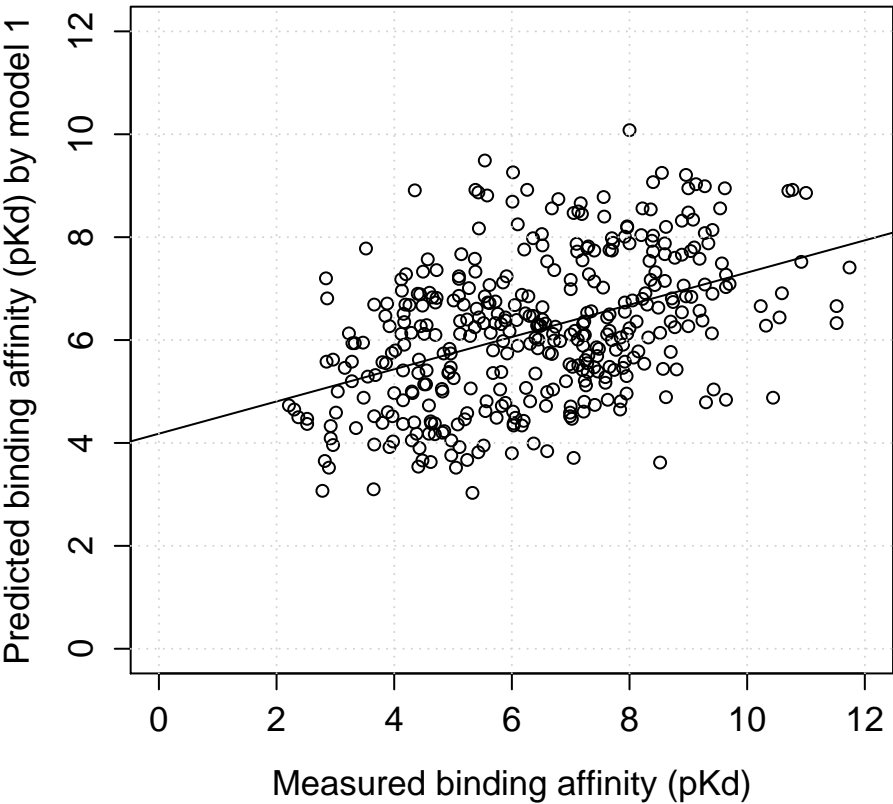

**N=382, RMSE=1.70, SD=1.69, Rp=0.520, Rs=0.505**

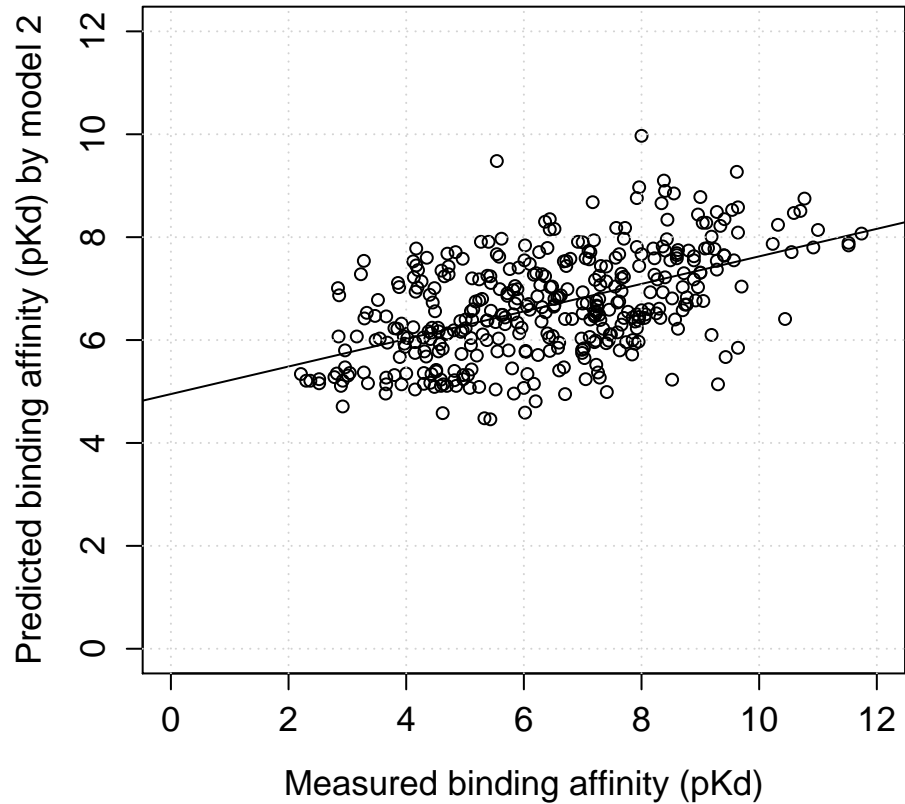

**N=382, RMSE=1.61, SD=1.60, Rp=0.585, Rs=0.549**

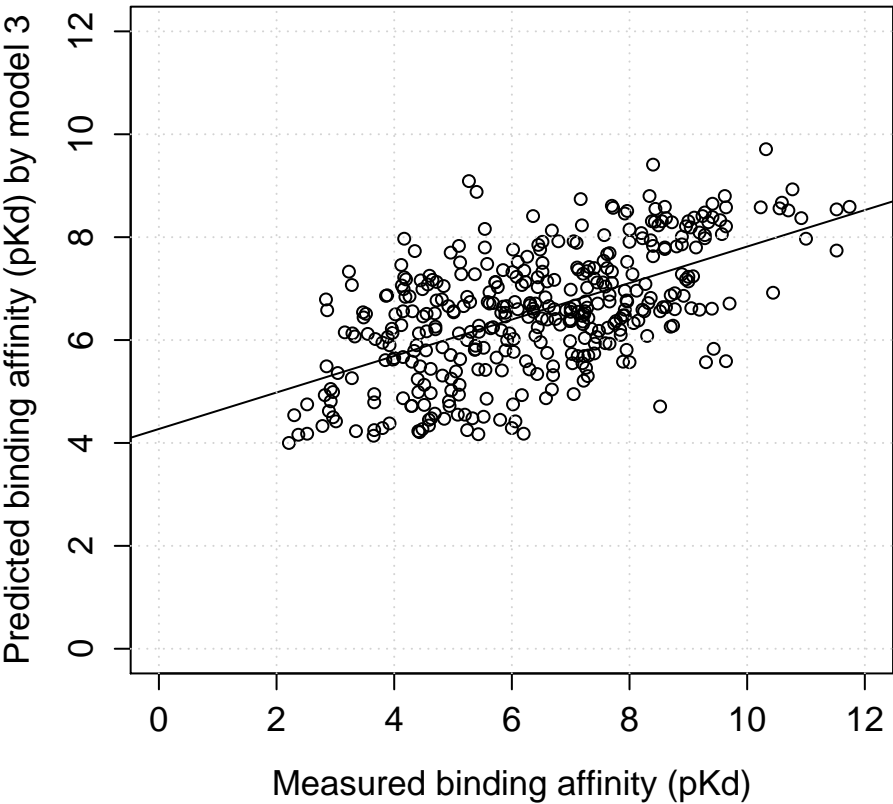

**N=382, RMSE=1.49, SD=1.49, Rp=0.656, Rs=0.633**

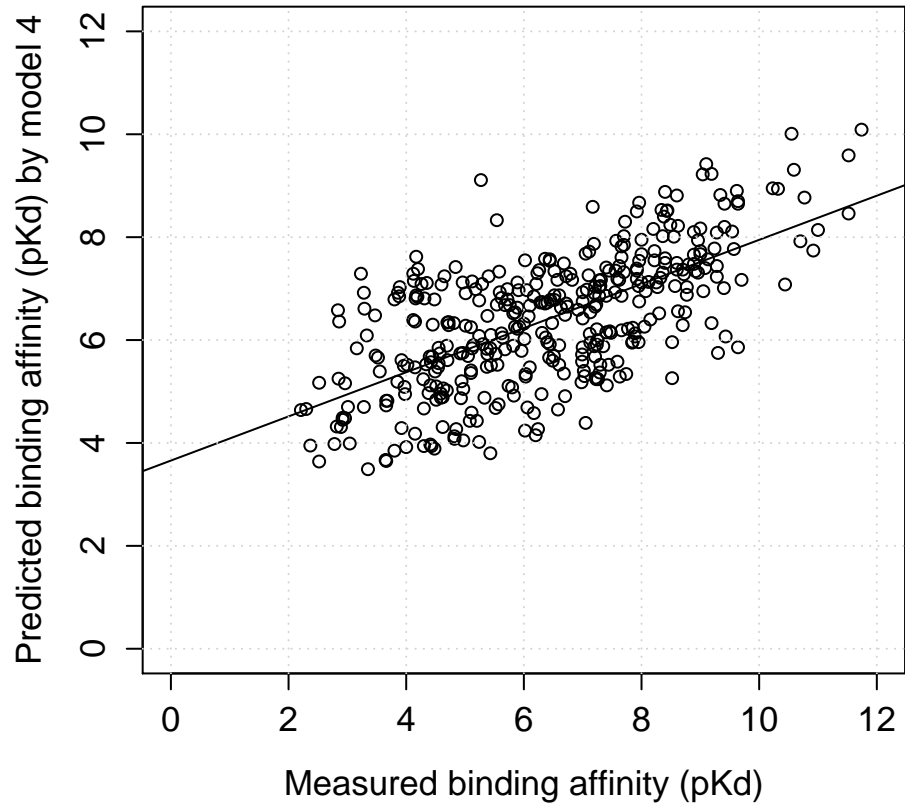

Supplement: 12859_2016_1169_MOESM2_ESM.pdf [file 12859_2016_1169_MOESM2_ESM.pdf]
