# Supplementary material for: Correcting the impact of docking pose generation error on binding affinity prediction
Source: Springer Nature journal article supplement (doi:10.1186/s12859-016-1169-4), 2016-09-01

**N=382, RMSE=1.87, SD=1.78, Rp=0.437, Rs=0.432**

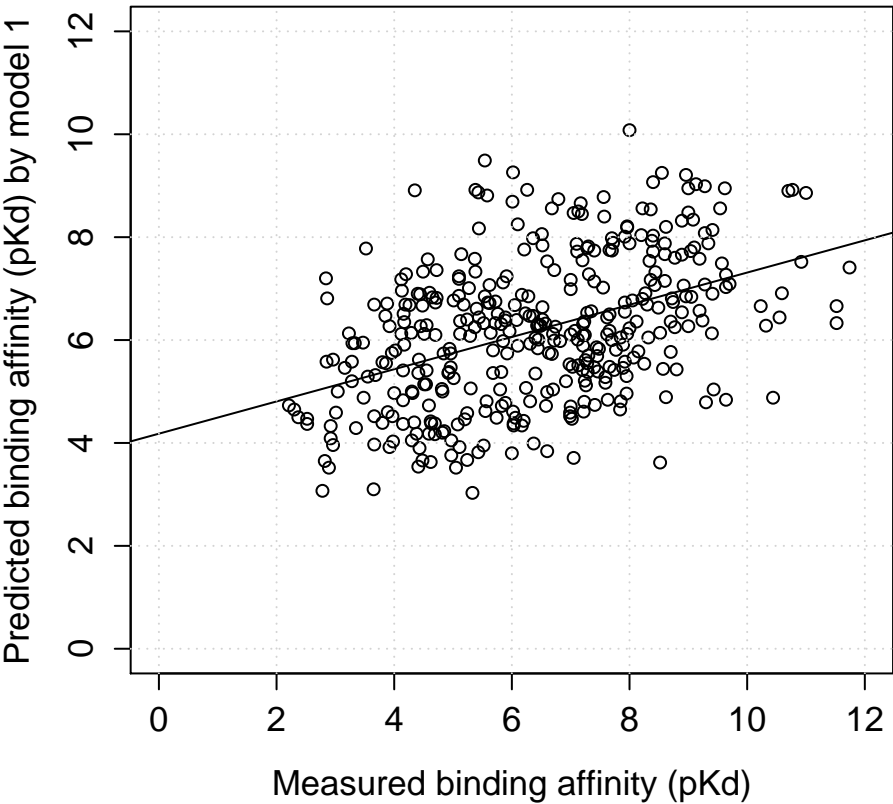

**N=382, RMSE=1.68, SD=1.68, Rp=0.524, Rs=0.509**

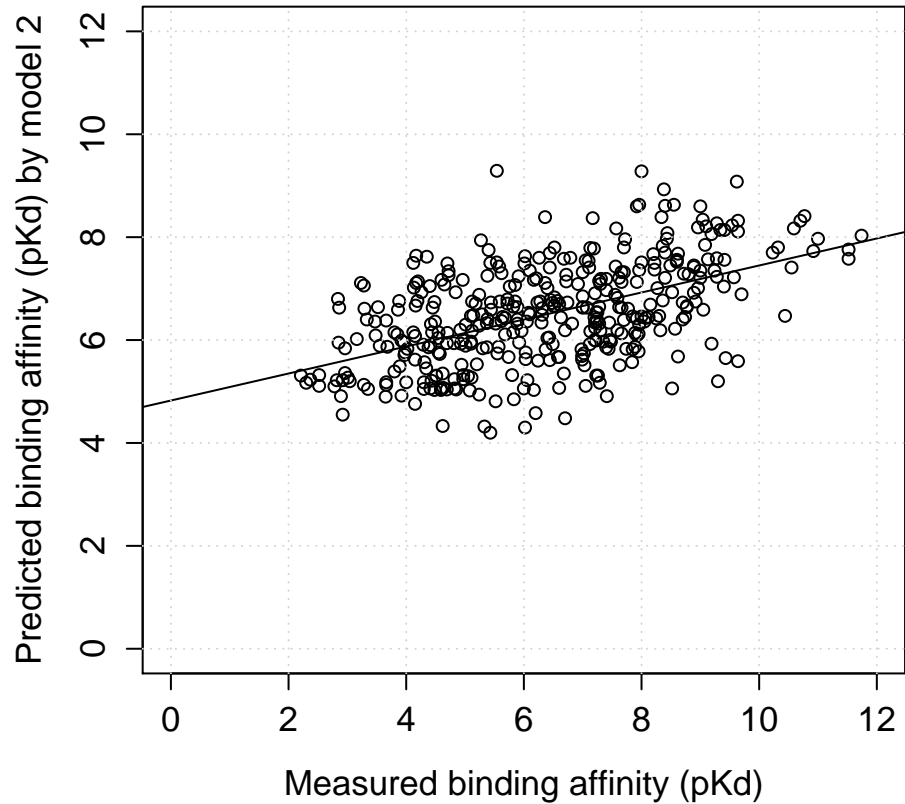

**N=382, RMSE=1.59, SD=1.59, Rp=0.594, Rs=0.553**

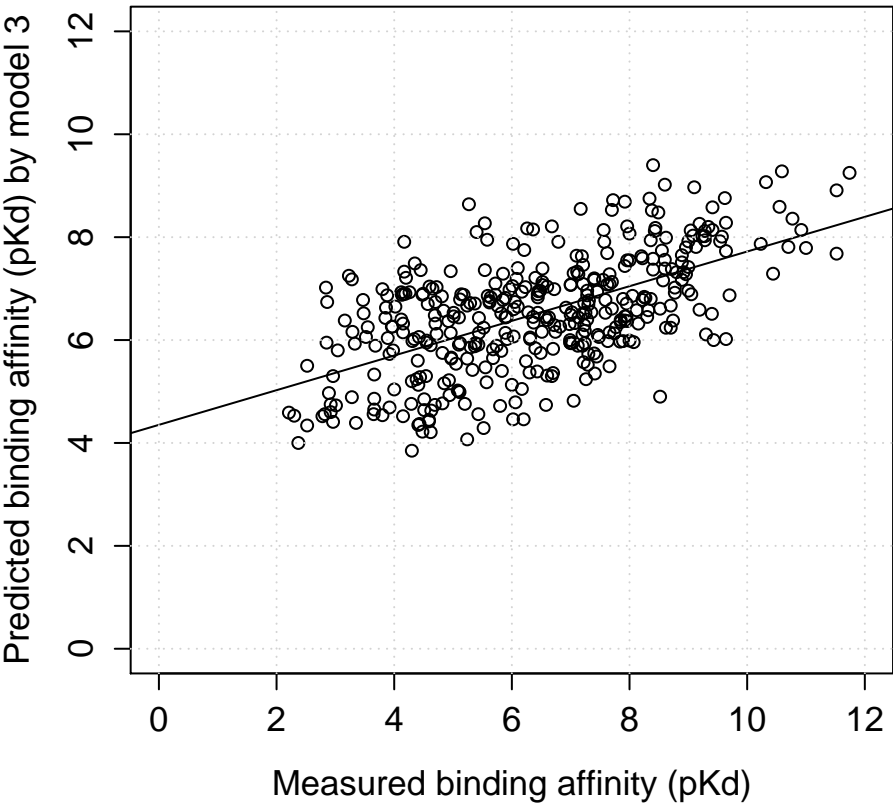

**N=382, RMSE=1.47, SD=1.48, Rp=0.665, Rs=0.643**

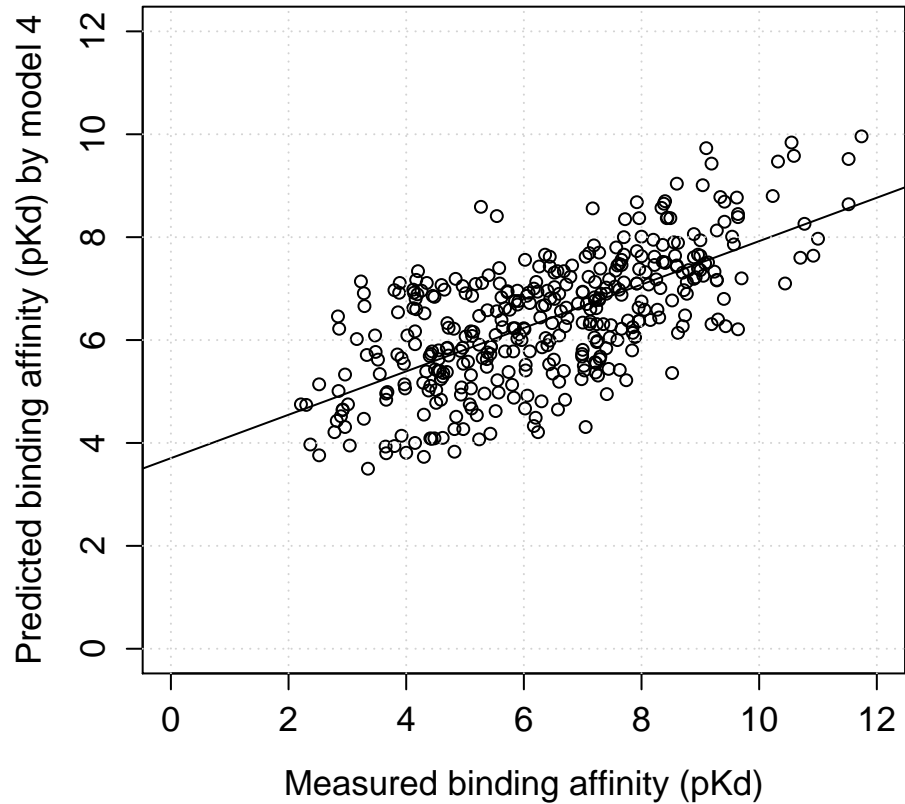

Supplement: 12859_2016_1169_MOESM3_ESM.pdf [file 12859_2016_1169_MOESM3_ESM.pdf]
