# Supplementary material for: Correcting the impact of docking pose generation error on binding affinity prediction
Source: Springer Nature journal article supplement (doi:10.1186/s12859-016-1169-4), 2016-09-01

**N=382, RMSE=2.30, SD=1.81, Rp=0.406, Rs=0.414**

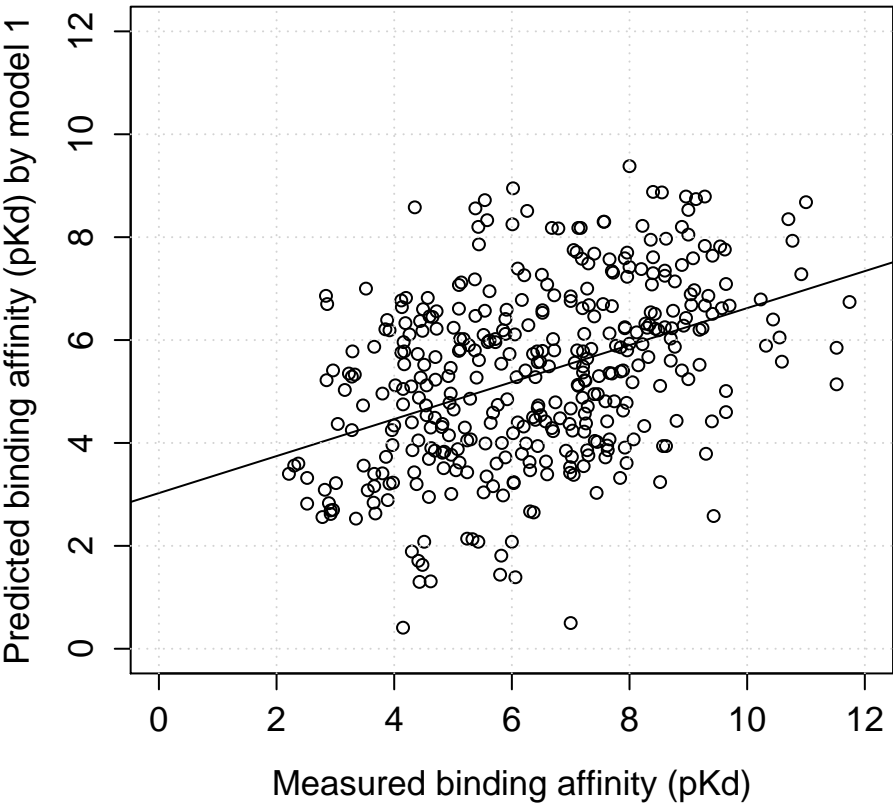

**N=382, RMSE=1.67, SD=1.67, Rp=0.535, Rs=0.521**

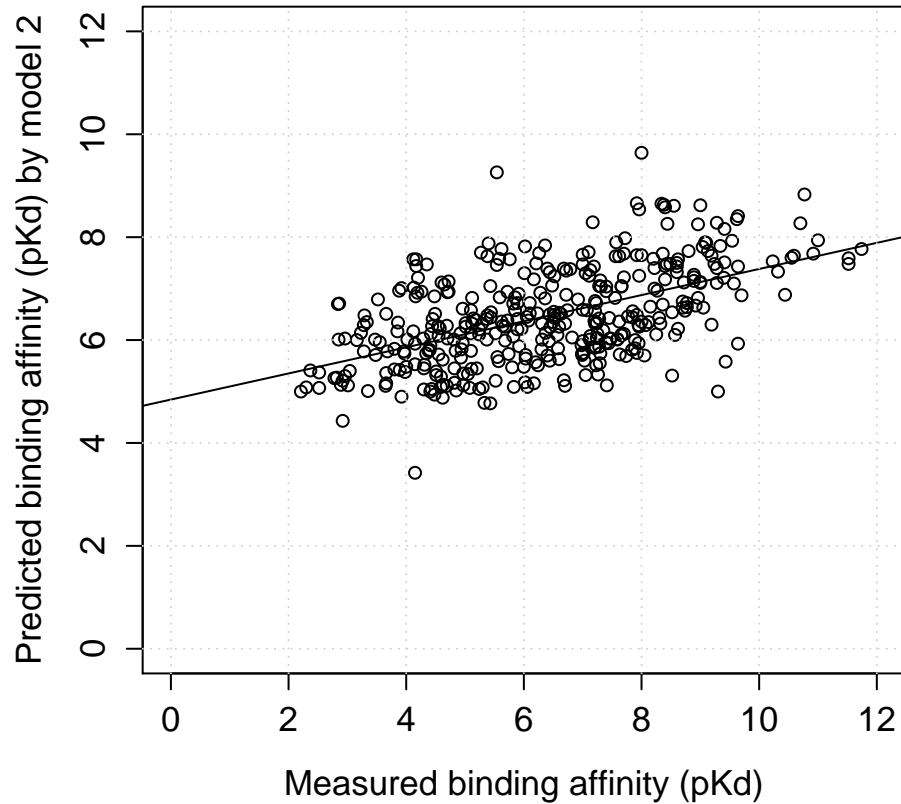

**N=382, RMSE=1.54, SD=1.54, Rp=0.629, Rs=0.593**

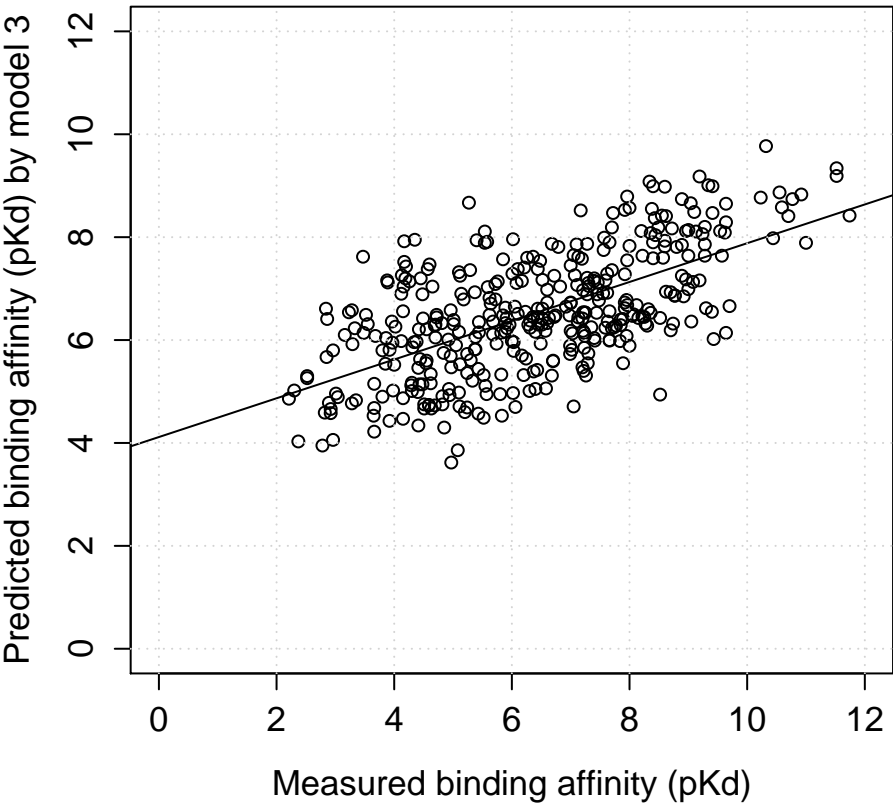

**N=382, RMSE=1.43, SD=1.43, Rp=0.689, Rs=0.662**

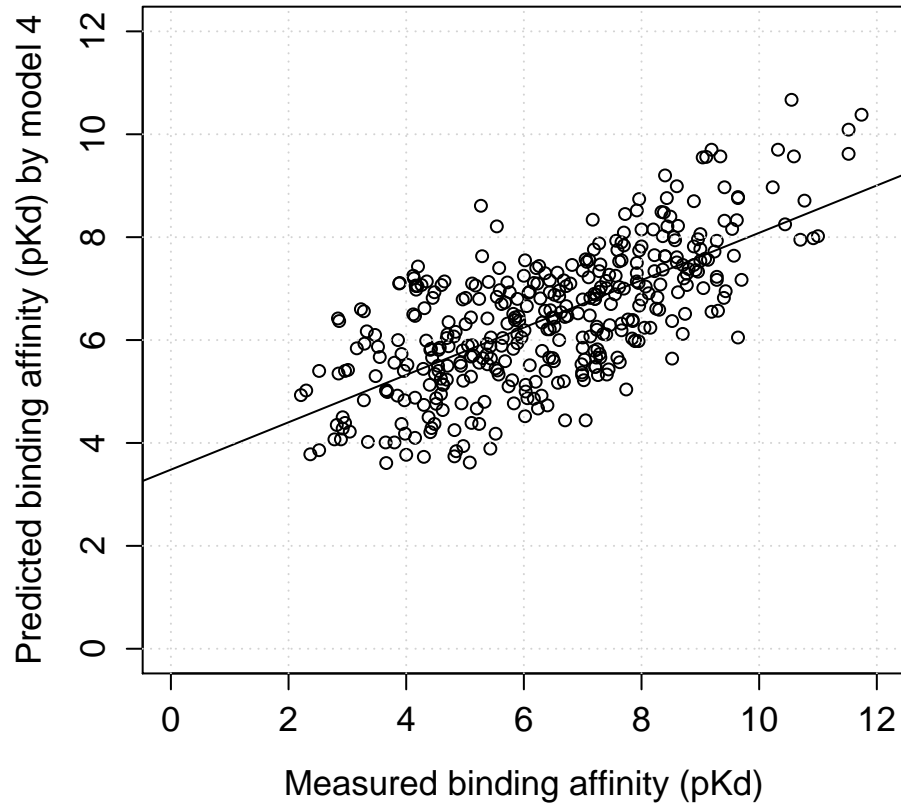

Supplement: MOESM1 [file 12859_2016_1169_MOESM1_ESM.pdf]
