# Supplementary material for: Correcting the impact of docking pose generation error on binding affinity prediction
Source: Springer Nature journal article supplement (doi:10.1186/s12859-016-1169-4), 2016-09-01

**N=382, RMSE=2.30, SD=1.81, Rp=0.406, Rs=0.414**

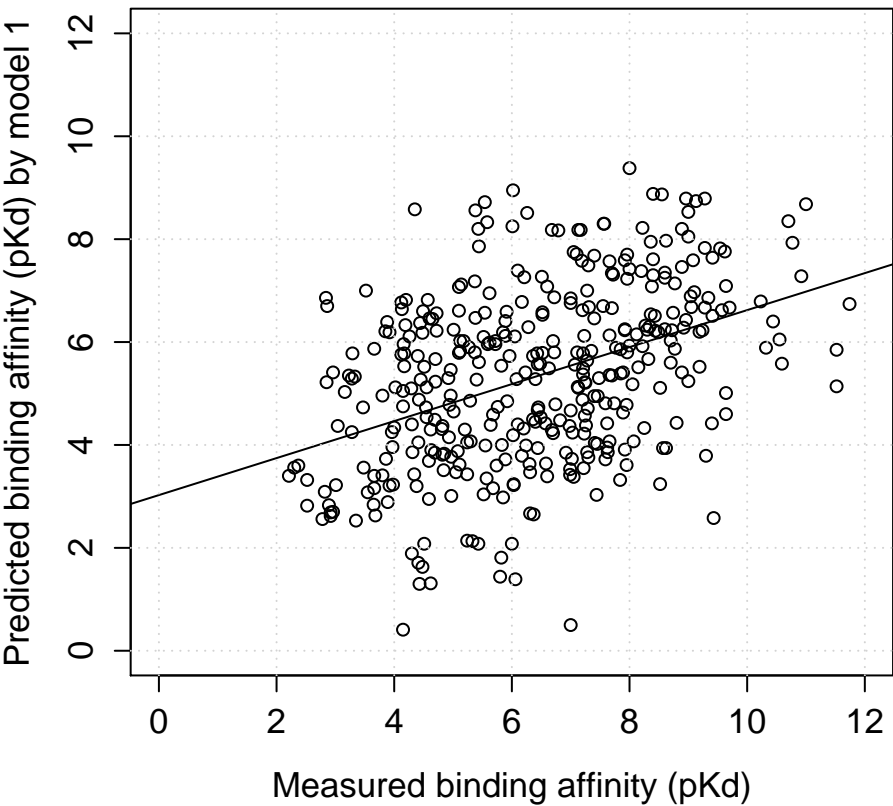

**N=382, RMSE=1.69, SD=1.69, Rp=0.521, Rs=0.509**

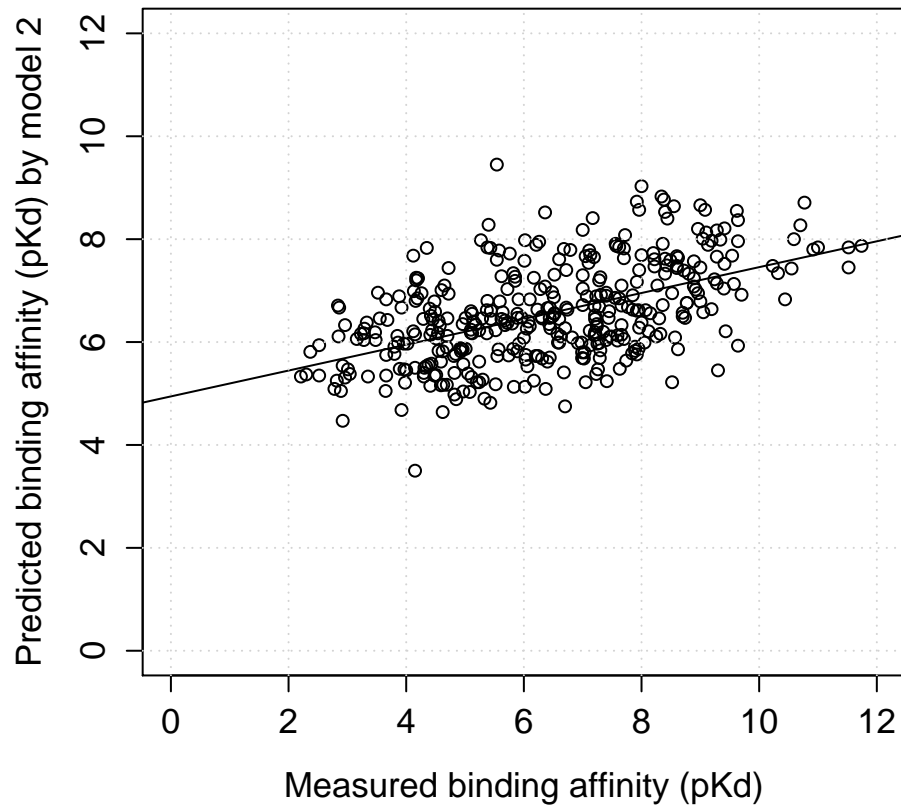

**N=382, RMSE=1.62, SD=1.61, Rp=0.580, Rs=0.560**

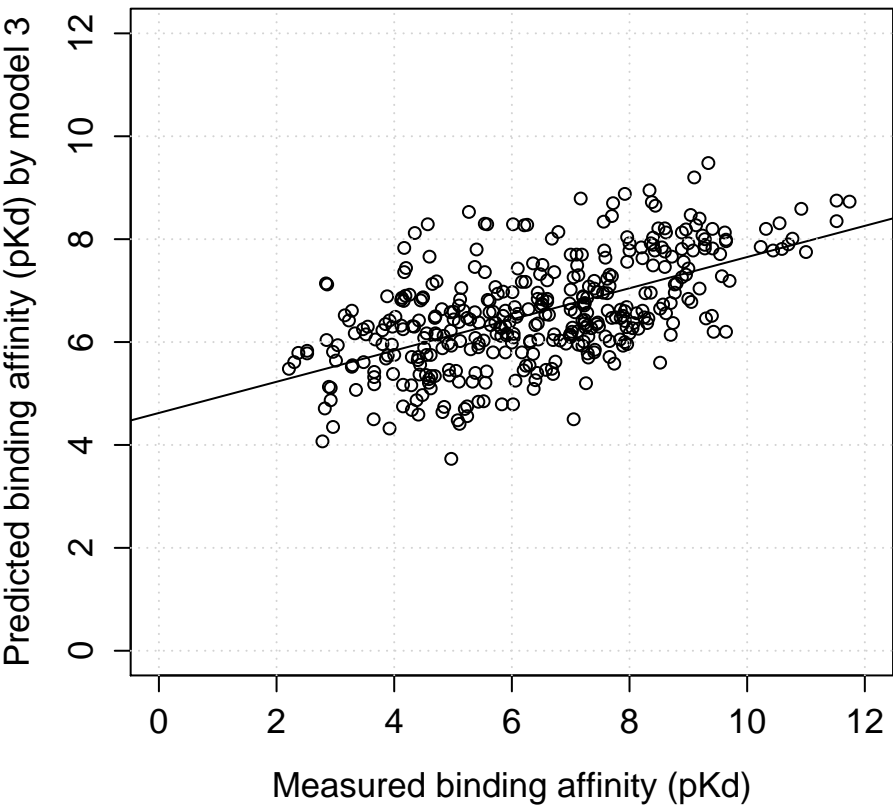

**N=382, RMSE=1.48, SD=1.47, Rp=0.669, Rs=0.650**

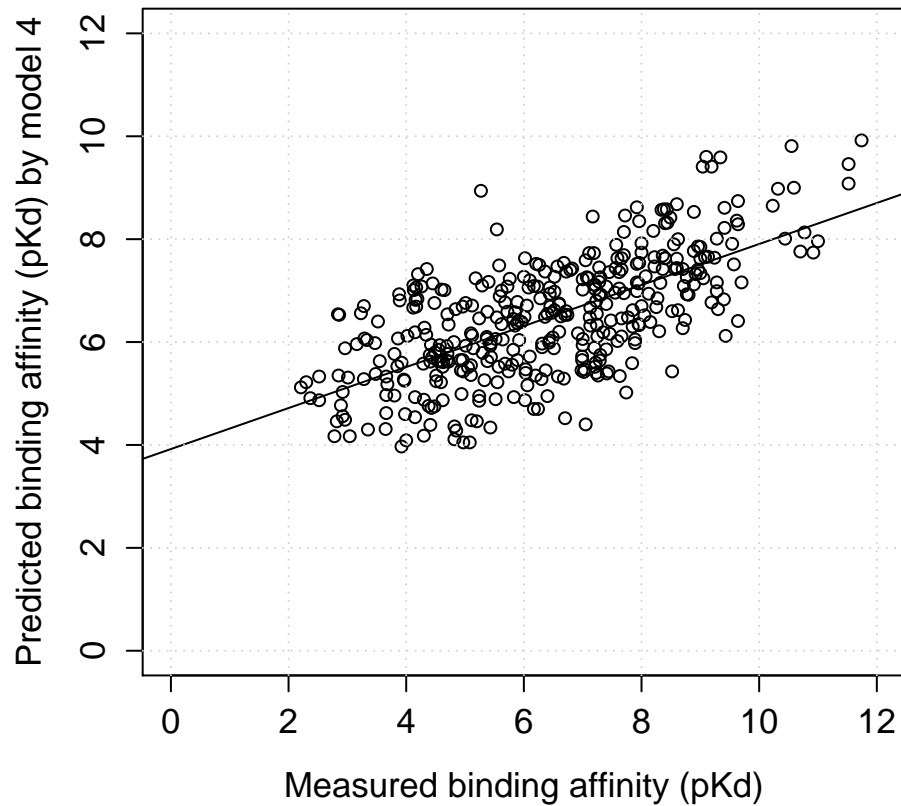

Supplement: MOESM4 [file 12859_2016_1169_MOESM4_ESM.pdf]
